# Supplementary material for: Intracellular HMGB1 as a novel tumor suppressor of pancreatic cancer
Source: PubMed Central journal article supplement (PMC5518983; doi:10.1038/cr.2017.51), 2017-04-04
Supplement: cr201751x1.pdf [file cr201751x1.pdf]

## Supplementary Information

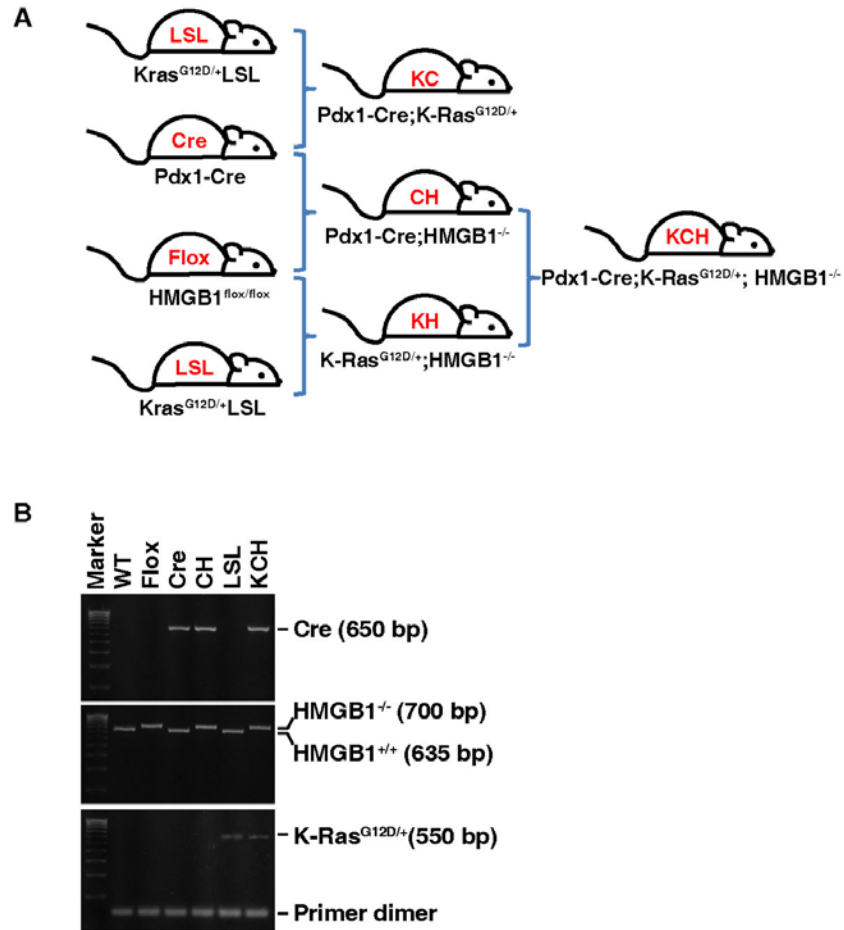

**Figure S1. Generation of KCH mice.** (A) Breeding scheme for producing transgenic mice. (B) Genotype identification of transgenic mice based on RT-PCR.
