# Supplementary material for: Intracellular HMGB1 as a novel tumor suppressor of pancreatic cancer
Source: PubMed Central journal article supplement (PMC5518983; doi:10.1038/cr.2017.51), 2017-04-04
Supplement: cr201751x2.pdf [file cr201751x2.pdf]

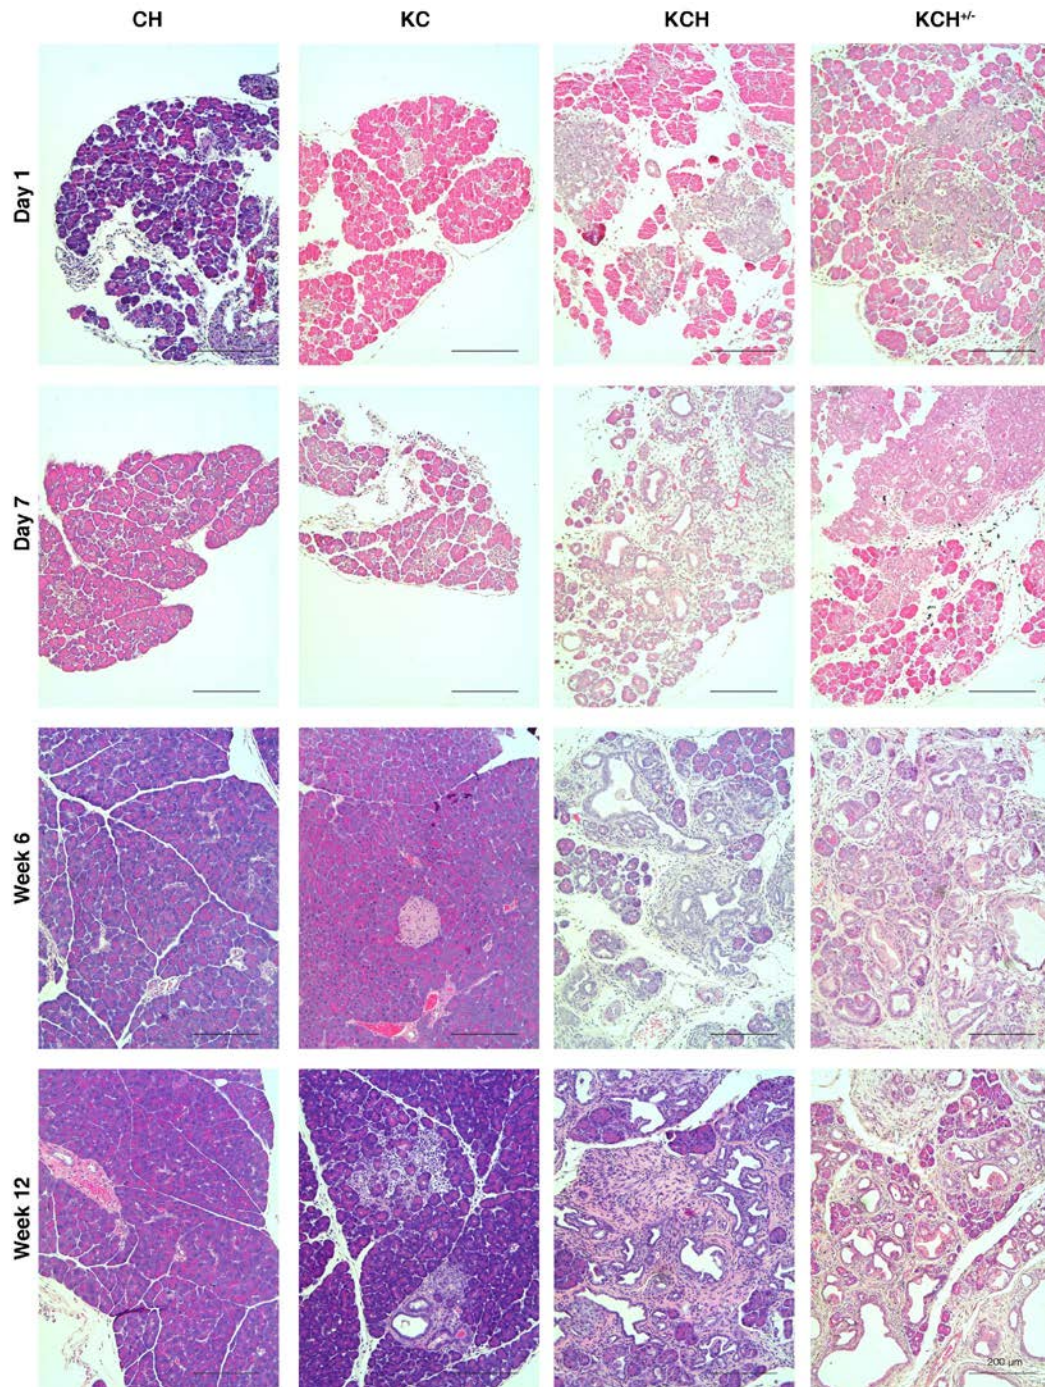

**Figure S2. Histologic progression of pancreas shown by hematoxylin and eosin staining in KC, CH, KCH, and KCH<sup>+/-</sup> mice.**
