# Supplementary material for: Intracellular HMGB1 as a novel tumor suppressor of pancreatic cancer
Source: PubMed Central journal article supplement (PMC5518983; doi:10.1038/cr.2017.51), 2017-04-04
Supplement: cr201751x3.pdf [file cr201751x3.pdf]

KCH (six weeks)

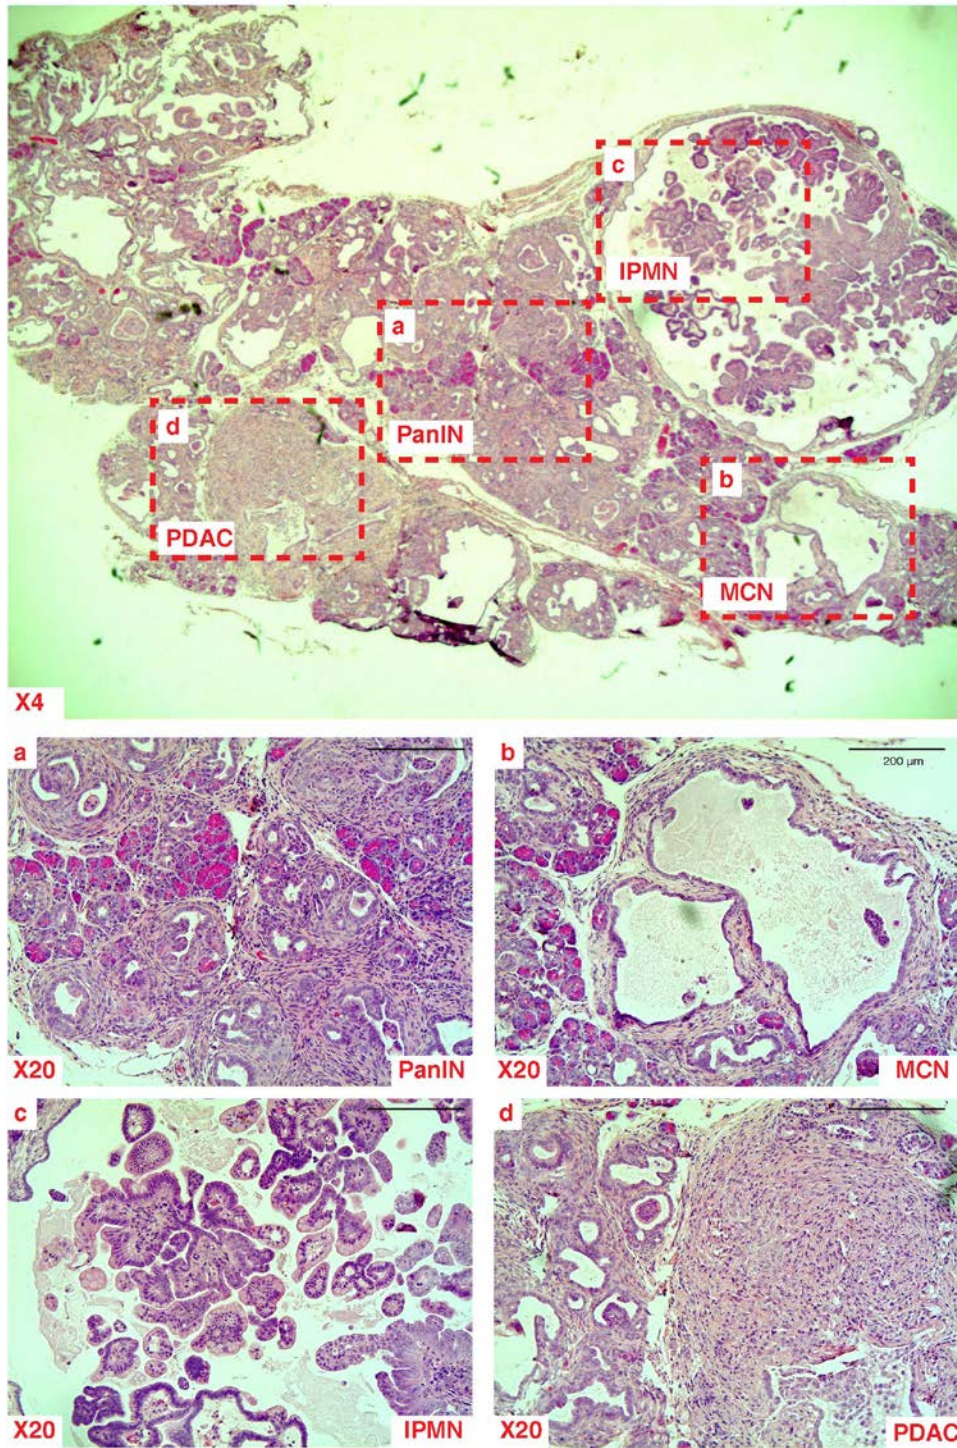

**Figure S3.** Representative hematoxylin and eosin stains of pancreatic intraepithelial neoplasms (PanINs) (a), mucinous cystic neoplasms (MCNs) (b), intraductal papillary mucinous neoplasms (IPMNs) (c), and pancreatic ductal adenocarcinoma (PDAC) (d) in KCH mice at six weeks of age.
