# Supplementary material for: Intracellular HMGB1 as a novel tumor suppressor of pancreatic cancer
Source: PubMed Central journal article supplement (PMC5518983; doi:10.1038/cr.2017.51), 2017-04-04
Supplement: cr201751x5.pdf [file cr201751x5.pdf]

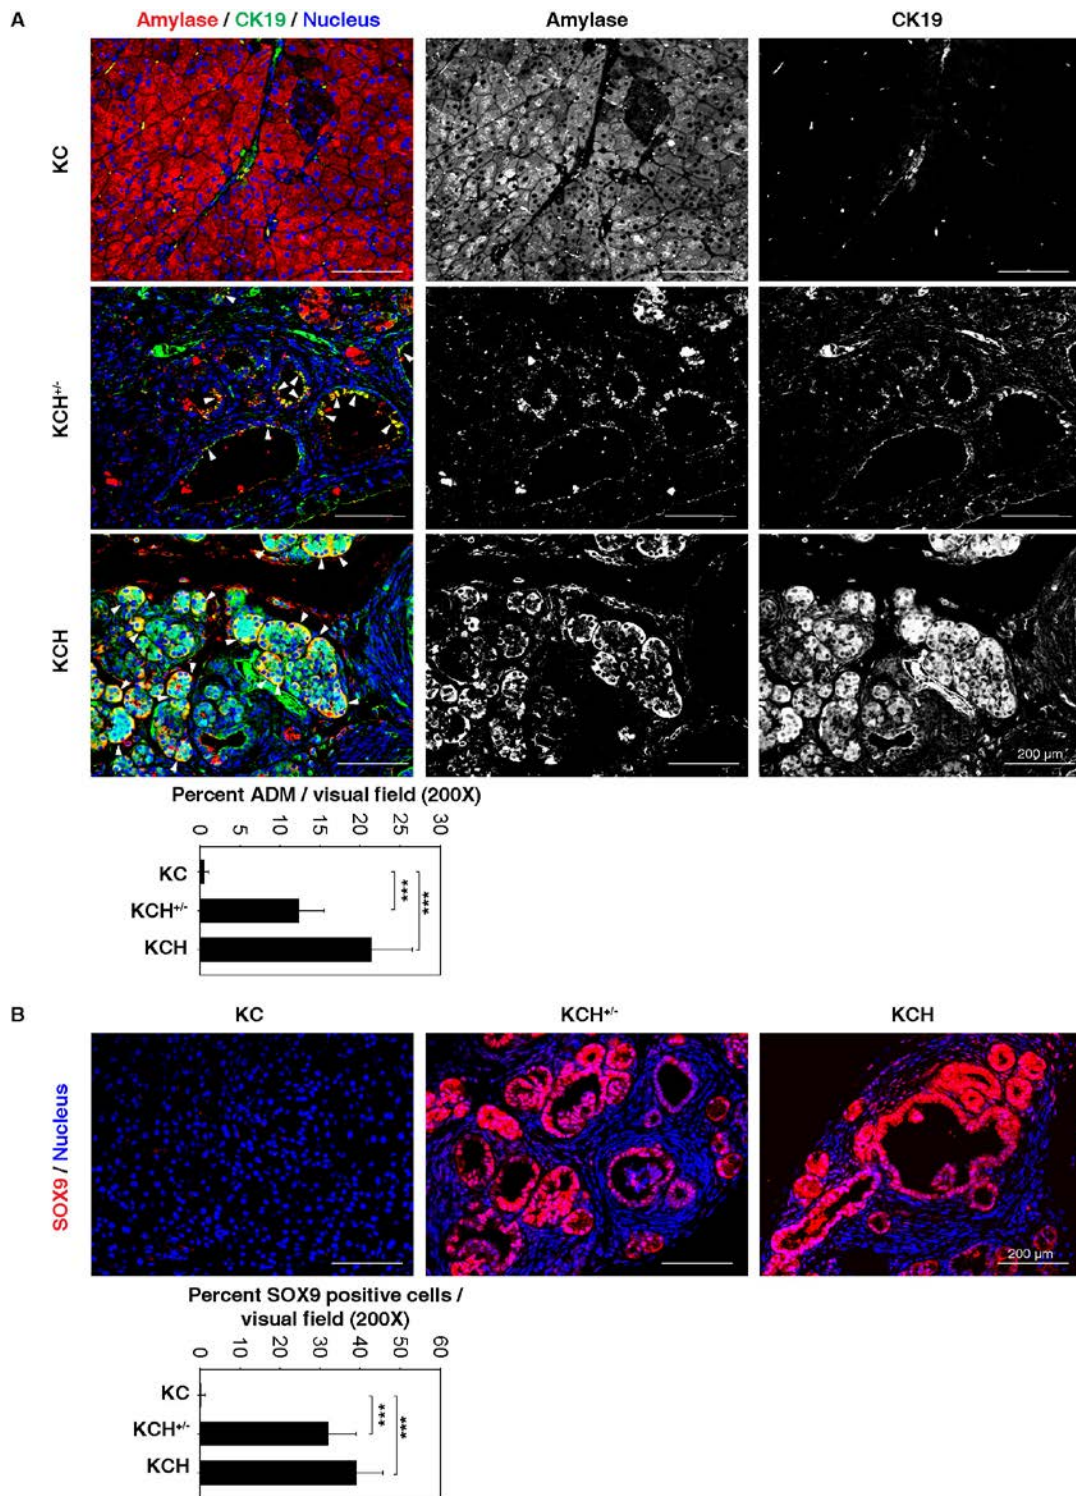

**Figure S5. KCH and KCH<sup>+/-</sup> mice exhibit significant acinar-to-ductal metaplasia (ADM).** (A) Analysis of ADM in pancreas by immunofluorescent (IF) staining of nuclei (blue), amylase (red), and CK19 (green) from indicated mice at six weeks of age (n=5 mice/genotype, \*\*\*p < 0.001, data are expressed as means ± s.e.m, unpaired t-test). (B) IF staining of nuclei (blue) and the ADM marker SOX9 (red) in pancreata from indicated mice at six weeks of age (n=5 mice/genotype, \*\*\*p < 0.001, data are expressed as means ± s.e.m, unpaired t-test).
