# Supplementary material for: Intracellular HMGB1 as a novel tumor suppressor of pancreatic cancer
Source: PubMed Central journal article supplement (PMC5518983; doi:10.1038/cr.2017.51), 2017-04-04
Supplement: cr201751x8.pdf [file cr201751x8.pdf]

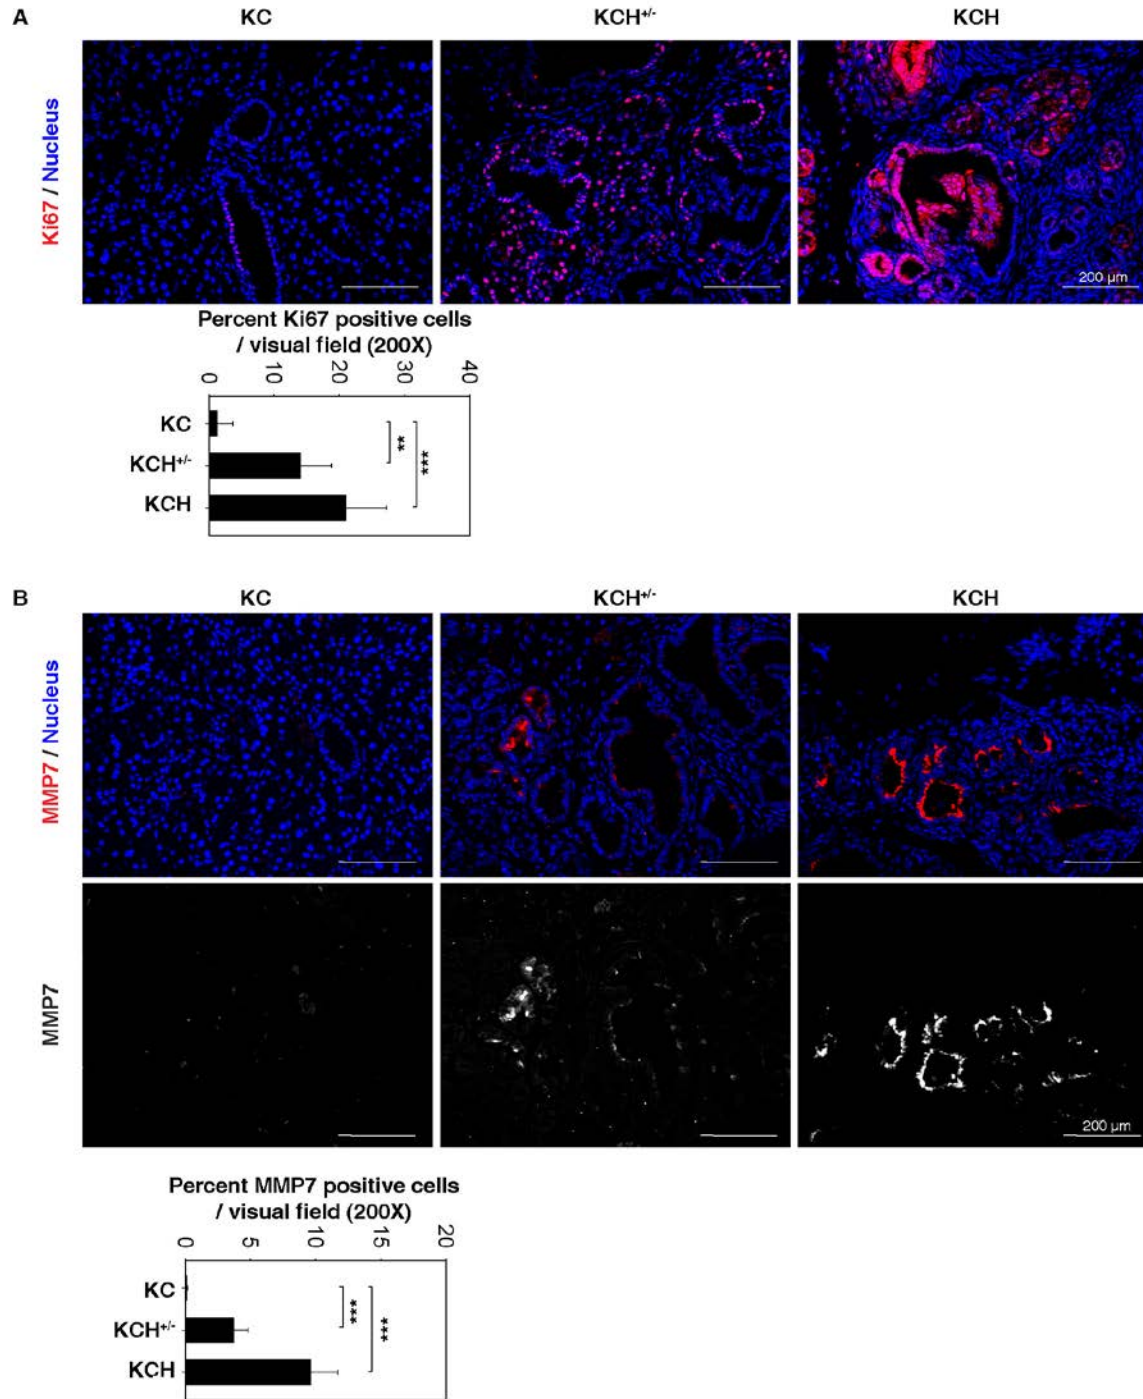

**Figure S8. KCH and KCH<sup>+/-</sup> mice exhibit significant proliferation and invasion.** (A) Immunofluorescent (IF) staining of nuclei (blue) and Ki67 (red) from indicated mice at six weeks of age (n=5 mice/genotype, \*\*p < 0.01, \*\*\*p < 0.001, data are expressed as means ± s.e.m, unpaired t-test). (B) IF staining of nuclei (blue) and MMP7 (red) from indicated mice at six weeks of age (n=5 mice/genotype, \*\*\*p < 0.001, data are expressed as means ± s.e.m, unpaired t-test).
