# Supplementary material for: Intracellular HMGB1 as a novel tumor suppressor of pancreatic cancer
Source: PubMed Central journal article supplement (PMC5518983; doi:10.1038/cr.2017.51), 2017-04-04
Supplement: cr201751x9.pdf [file cr201751x9.pdf]

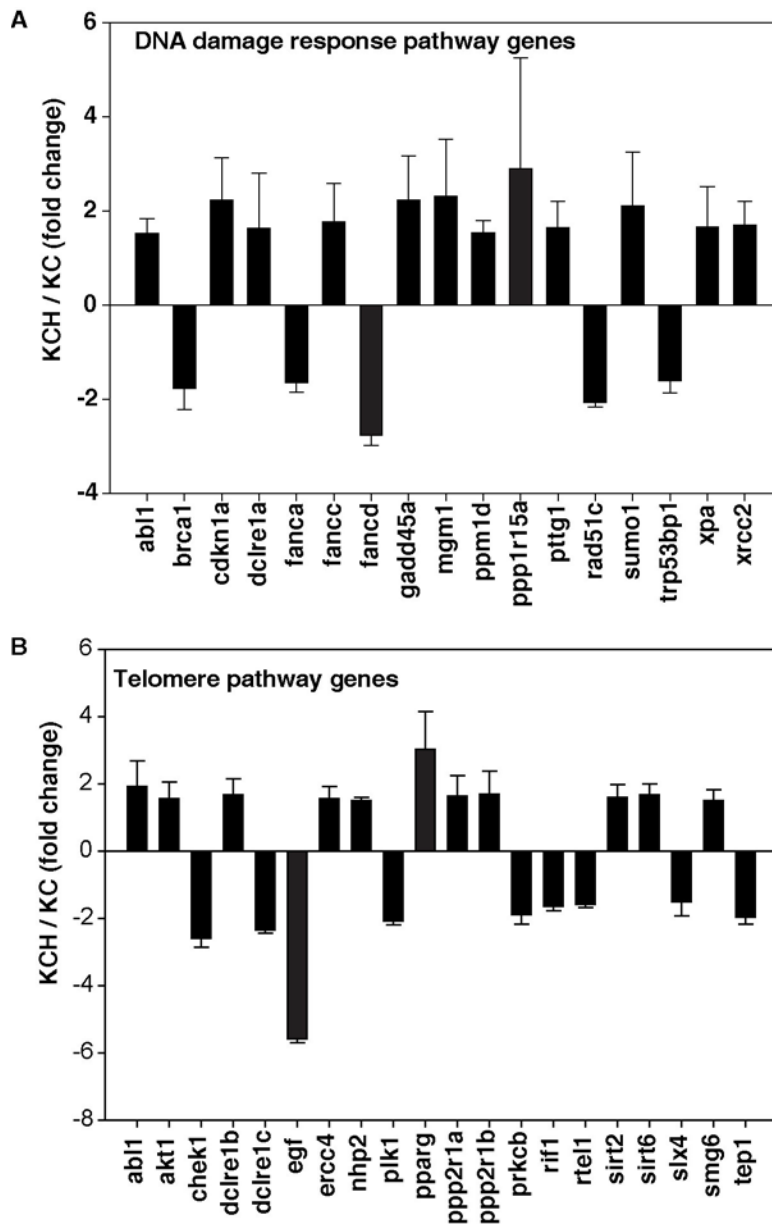

**Figure S9. Pancreata from KCH mice exhibit abnormal mRNA expression of genes involved in regulating the DNA damage response (A) and telomere maintenance (B) by RT<sup>2</sup> Profiler™ PCR Array (n=3 mice/genotype).**
