# Supplementary material for: Intracellular HMGB1 as a novel tumor suppressor of pancreatic cancer
Source: PubMed Central journal article supplement (PMC5518983; doi:10.1038/cr.2017.51), 2017-04-04
Supplement: cr201751x10.pdf [file cr201751x10.pdf]

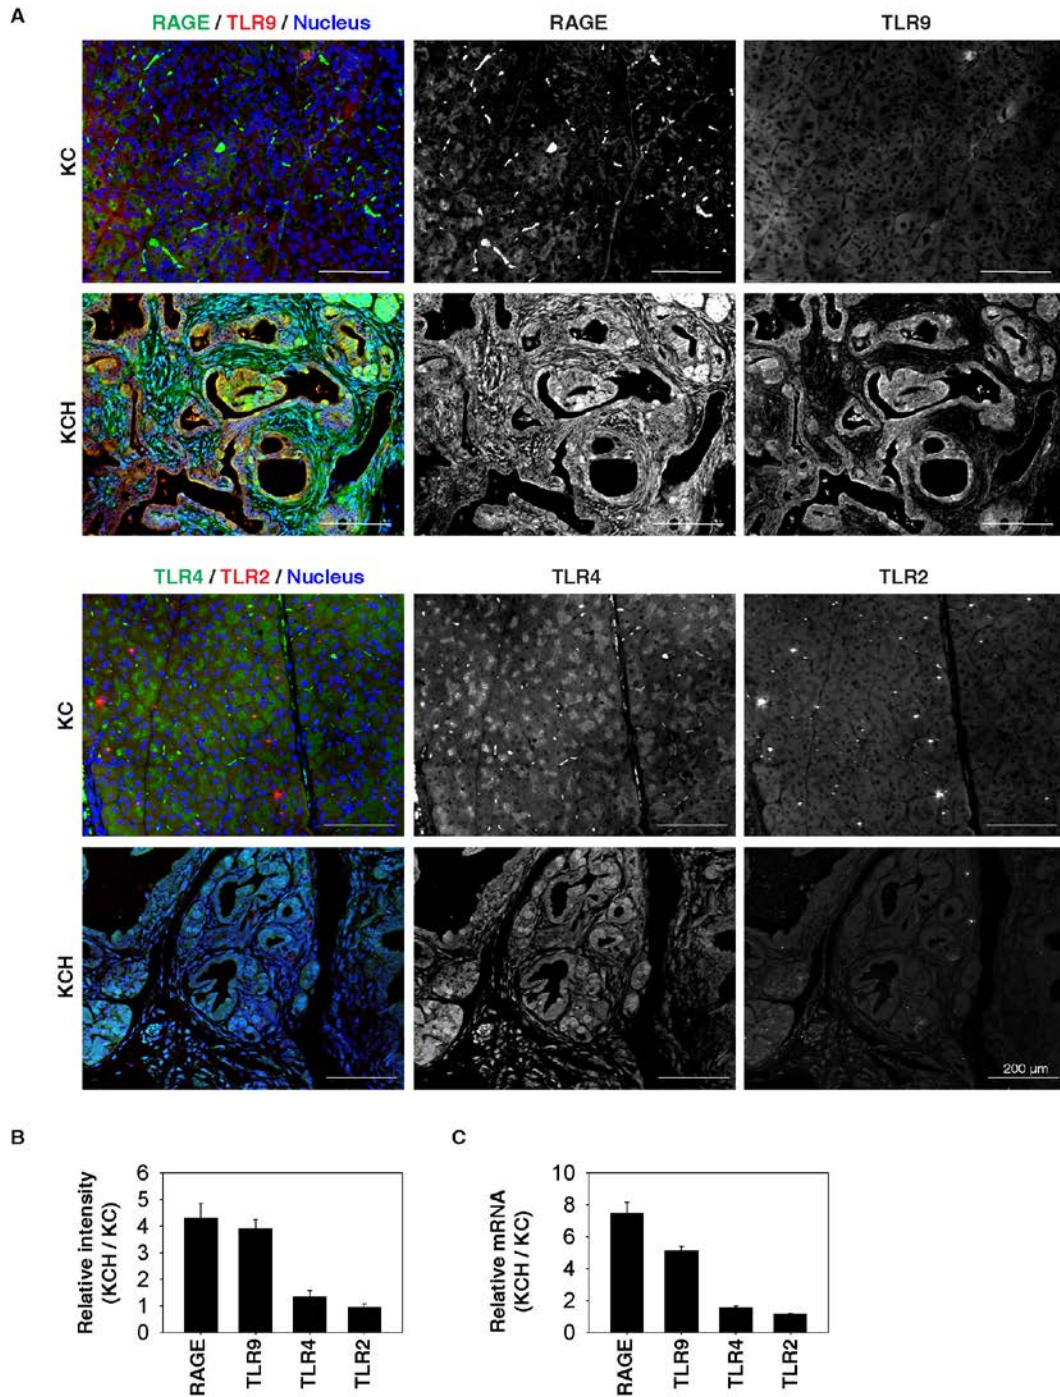

**Figure S10. KCH mice exhibit abnormal expression of nucleosome receptors.** (A-B) Immunofluorescent staining of nuclei (blue), RAGE (green), TLR9 (red), TLR4 (green), or TLR2 (red) from KC and KCH mice at six weeks of age (n=5 mice/genotype, data are expressed as means  $\pm$  s.e.m). (C) Fold change of nucleosome receptor mRNA expression in KC and KCH mice by Q-PCR analysis (n=3 mice/genotype, data are expressed as means  $\pm$  s.e.m).
