# Supplementary material for: Intracellular HMGB1 as a novel tumor suppressor of pancreatic cancer
Source: PubMed Central journal article supplement (PMC5518983; doi:10.1038/cr.2017.51), 2017-04-04
Supplement: cr201751x12.pdf [file cr201751x12.pdf]

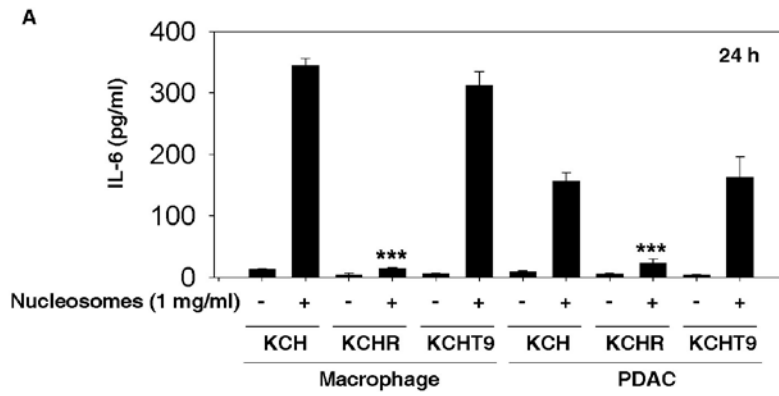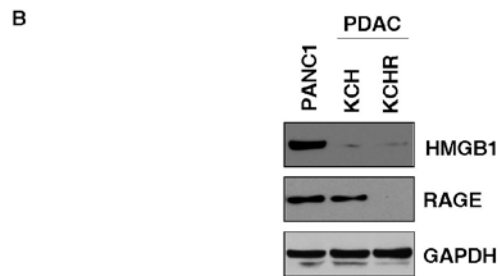

**Figure S12. (A) Loss of RAGE (but not TLR9) diminished recombinant nucleosomes-induced IL-6 release in isolated peritoneal macrophages and PDAC cells from indicated mice at 6 weeks of age (n=3, \*\*\*p < 0.001, data are expressed as means  $\pm$  s.e.m, unpaired t-test versus KCH group). (B) Western blot analysis of HMGB1 and RAGE expression in PDAC cells from KCH and KCHR mice. Human PANC1 cell lines were as a positive control.**
