# Supplementary material for: Intracellular HMGB1 as a novel tumor suppressor of pancreatic cancer
Source: PubMed Central journal article supplement (PMC5518983; doi:10.1038/cr.2017.51), 2017-04-04
Supplement: cr201751x13.pdf [file cr201751x13.pdf]

**Table S1. Data on tumor metastasis and invasion in KC, KCH, and KCH<sup>+/-</sup> mice**

| No. | Strain | Sex | Age (week) | Weight loss | Metastasis/invasion     |
|-----|--------|-----|------------|-------------|-------------------------|
| 1   | KC     | F   | 6          | N           | N                       |
| 2   | KC     | F   | 12         | N           | N                       |
| 3   | KC     | F   | 12         | N           | N                       |
| 4   | KC     | F   | 24         | N           | N                       |
| 5   | KC     | M   | 6          | N           | N                       |
| 6   | KC     | M   | 12         | N           | N                       |
| 7   | KC     | M   | 12         | N           | N                       |
| 8   | KC     | M   | 24         | N           | N                       |
| 9   | KC     | M   | 24         | Y           | N                       |
| 10  | KC     | M   | 24         | Y           | Y (lung)                |
| 11  | KCH    | F   | 6          | Y           | N                       |
| 12  | KCH    | F   | 6          | Y           | N                       |
| 13  | KCH    | F   | 6          | Y           | N                       |
| 14  | KCH    | F   | 6          | Y           | N                       |
| 15  | KCH    | F   | 8          | Y           | N                       |
| 16  | KCH    | F   | 8          | Y           | Y (lung)                |
| 17  | KCH    | F   | 12         | Y           | N                       |
| 18  | KCH    | F   | 12         | Y           | Y (lung, kidney)        |
| 19  | KCH    | F   | 24         | Y           | Y (lung, liver)         |
| 20  | KCH    | M   | 6          | Y           | N                       |
| 21  | KCH    | M   | 6          | Y           | N                       |
| 22  | KCH    | M   | 6          | Y           | N                       |
| 23  | KCH    | M   | 6          | Y           | N                       |
| 24  | KCH    | M   | 6          | Y           | Y (lung, liver)         |
| 25  | KCH    | M   | 8          | Y           | N                       |
| 26  | KCH    | M   | 8          | Y           | Y (lung)                |
| 27  | KCH    | M   | 8          | Y           | N                       |
| 28  | KCH    | M   | 8          | Y           | Y (lung)                |
| 29  | KCH    | M   | 12         | Y           | N                       |
| 30  | KCH    | M   | 12         | Y           | Y (lung, liver, kidney) |

|    |                    |   |    |   |                         |
|----|--------------------|---|----|---|-------------------------|
| 31 | KCH                | M | 12 | Y | Y (liver, kidney)       |
| 32 | KCH                | M | 24 | Y | Y (lung, liver, kidney) |
| 33 | KCH <sup>+/-</sup> | F | 6  | Y | N                       |
| 34 | KCH <sup>+/-</sup> | F | 6  | Y | N                       |
| 35 | KCH <sup>+/-</sup> | F | 12 | Y | Y (lung)                |
| 36 | KCH <sup>+/-</sup> | F | 24 | Y | Y (liver)               |
| 37 | KCH <sup>+/-</sup> | M | 6  | Y | N                       |
| 38 | KCH <sup>+/-</sup> | M | 6  | Y | N                       |
| 39 | KCH <sup>+/-</sup> | M | 8  | Y | Y (lung)                |
| 40 | KCH <sup>+/-</sup> | M | 24 | Y | Y (lung, liver, kidney) |

F, female; M, male; Y, yes; N, no
